# Supplementary material
Source: PubMed Central journal article supplement (PMC6641319)
Supplement: ao7b01830_si_001.pdf [file ao7b01830_si_001.pdf]

## Supporting Information

### The Purely Inorganic Highly Efficient Ice Nucleating Particle

Mainak Ganguly<sup>a</sup> Simon Dib<sup>b</sup> and Parisa A. Ariya<sup>\*a,b</sup>

<sup>a</sup>Department of Atmospheric and Oceanic Sciences, McGill University, Montreal, Quebec

H3A 0B9, Canada

<sup>b</sup>Department of Chemistry, McGill University, Montreal, Quebec H3A 0B8, Canada

**A**

| Element | Weight % | Atomic % | Net Int. | Error % | Kratio | Z      | A      | F      |
|---------|----------|----------|----------|---------|--------|--------|--------|--------|
| C K     | 15.65    | 23.48    | 58.42    | 11.30   | 0.0512 | 1.1064 | 0.2958 | 1.0000 |
| O K     | 49.02    | 55.20    | 541.92   | 6.75    | 0.2961 | 1.0460 | 0.5775 | 1.0000 |
| AlK     | 16.80    | 11.22    | 216.22   | 4.36    | 0.1379 | 0.9117 | 0.8983 | 1.0020 |
| SiK     | 15.27    | 9.79     | 179.04   | 5.06    | 0.1248 | 0.9287 | 0.8795 | 1.0010 |
| PtM     | 3.26     | 0.30     | 11.01    | 22.87   | 0.0197 | 0.5487 | 1.1082 | 0.9964 |

**B**

| Element | Weight % | Atomic % | Net Int. | Error % | Kratio | Z      | A      | F      |
|---------|----------|----------|----------|---------|--------|--------|--------|--------|
| C K     | 13.02    | 32.23    | 49.82    | 10.72   | 0.0688 | 1.2866 | 0.4103 | 1.0000 |
| O K     | 18.03    | 33.50    | 154.20   | 7.10    | 0.1325 | 1.2218 | 0.6011 | 1.0000 |
| FeL     | 62.56    | 33.30    | 185.13   | 5.34    | 0.4326 | 0.9120 | 0.7581 | 1.0000 |
| PtM     | 6.38     | 0.97     | 16.55    | 13.49   | 0.0467 | 0.6483 | 1.0986 | 1.0263 |

**C**

| Element | Weight % | Atomic % | Net Int. | Error % | Kratio | Z      | A      | F      |
|---------|----------|----------|----------|---------|--------|--------|--------|--------|
| C K     | 15.51    | 28.84    | 43.39    | 11.50   | 0.0652 | 1.1884 | 0.3539 | 1.0000 |
| O K     | 32.32    | 45.12    | 227.30   | 7.15    | 0.2127 | 1.1264 | 0.5844 | 1.0000 |
| FeL     | 32.17    | 12.87    | 70.45    | 7.38    | 0.1794 | 0.8401 | 0.6637 | 1.0000 |
| AlK     | 8.71     | 7.21     | 62.70    | 6.84    | 0.0685 | 0.9860 | 0.7959 | 1.0013 |
| SiK     | 6.86     | 5.45     | 48.44    | 7.86    | 0.0578 | 1.0051 | 0.8380 | 1.0015 |
| PtM     | 4.43     | 0.51     | 9.64     | 20.71   | 0.0296 | 0.5945 | 1.1052 | 1.0175 |

**D**

| Element | Weight % | Atomic % | Net Int. | Error % | Kratio | Z      | A      | F      |
|---------|----------|----------|----------|---------|--------|--------|--------|--------|
| C K     | 20.53    | 38.76    | 76.52    | 10.73   | 0.0876 | 1.2441 | 0.3432 | 1.0000 |
| O K     | 30.33    | 42.99    | 225.71   | 8.67    | 0.1611 | 1.1812 | 0.4497 | 1.0000 |
| FeL     | 3.42     | 1.39     | 9.35     | 27.37   | 0.0181 | 0.8817 | 0.6008 | 1.0000 |
| AlK     | 7.04     | 5.92     | 74.32    | 6.47    | 0.0619 | 1.0376 | 0.8477 | 1.0004 |
| SiK     | 6.26     | 5.05     | 63.78    | 7.13    | 0.0581 | 1.0584 | 0.8764 | 1.0007 |
| PtM     | 4.39     | 0.51     | 13.21    | 16.97   | 0.0309 | 0.6267 | 1.1180 | 1.0052 |
| HgM     | 23.84    | 2.70     | 67.89    | 7.94    | 0.1638 | 0.6207 | 1.1020 | 1.0047 |
| ClK     | 4.20     | 2.69     | 23.06    | 14.50   | 0.0369 | 0.9811 | 0.8977 | 0.9972 |

**Figure S1.** Elemental analysis of (A) kaolin, (B) BHFe, (C) KaFe and (D) HgKaFe

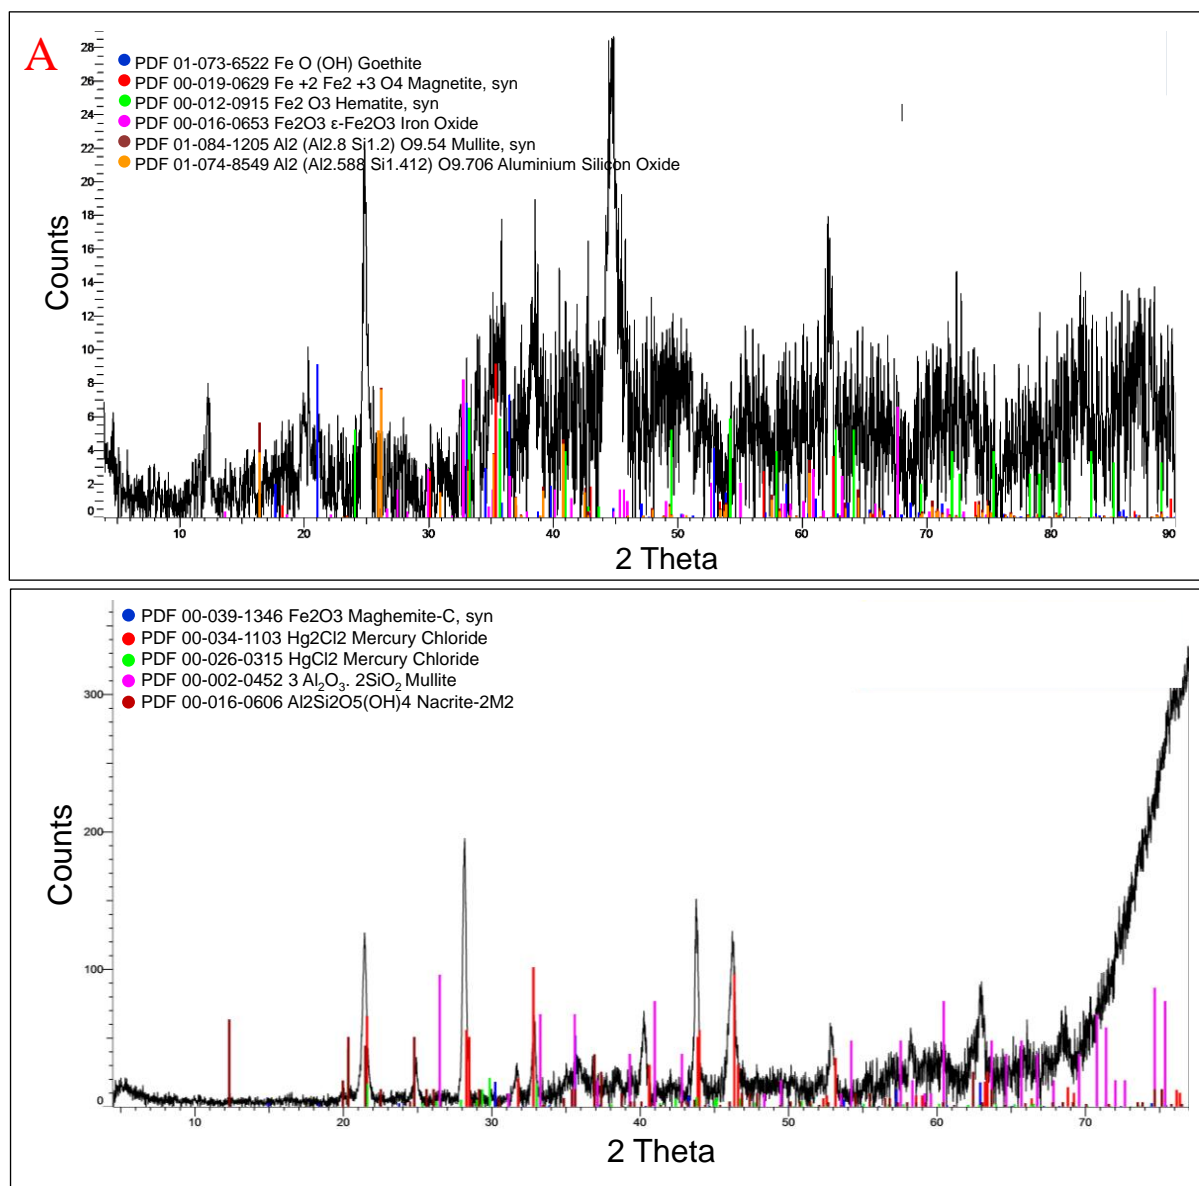

**Figure S2.** (A) and (B) represent powder XRD spectra of KaFe and HgKaFe with probable match.

## Pattern List #1

| Show | Icon                                                                              | Color                                                                             | Index | Name            | Parent          |
|------|-----------------------------------------------------------------------------------|-----------------------------------------------------------------------------------|-------|-----------------|-----------------|
| Yes  |  |  | 1     | PDF 01-073-6522 | Pattern List #1 |
| Yes  |  |  | 2     | PDF 00-019-0629 | Pattern List #1 |
| Yes  |  |  | 3     | PDF 00-002-0915 | Pattern List #1 |
| Yes  |  |  | 4     | PDF 00-016-0653 | Pattern List #1 |
| Yes  |  |  | 5     | PDF 01-084-1205 | Pattern List #1 |
| Yes  |  |  | 6     | PDF 01-074-8549 | Pattern List #1 |

| Scan                                     | Pattern #       | Compound Name                                           |
|------------------------------------------|-----------------|---------------------------------------------------------|
| KaFeblack0_01_exported_3.91_90.00.raw #1 | PDF 01-073-6522 | Goethite                                                |
| KaFeblack0_01_exported_3.91_90.00.raw #1 | PDF 00-019-0629 | Magnetite, syn                                          |
| KaFeblack0_01_exported_3.91_90.00.raw #1 | PDF 00-002-0915 | Hematite, syn                                           |
| KaFeblack0_01_exported_3.91_90.00.raw #1 | PDF 00-016-0653 | $\epsilon$ -Fe <sub>2</sub> O <sub>3</sub>   Iron Oxide |
| KaFeblack0_01_exported_3.91_90.00.raw #1 | PDF 01-084-1205 | Mullite, syn                                            |
| KaFeblack0_01_exported_3.91_90.00.raw #1 | PDF 01-074-8549 | Aluminum Oxide Silicon                                  |

| Formula                        | Quality  | Y-Scale | I/Ic DB | I/Ic User | S-Q    | Concentration Level |
|--------------------------------|----------|---------|---------|-----------|--------|---------------------|
| Fe O ( O H )                   | Indexed  | 32.99 % | 2.210   | 0.000     | 10.2 % | Major               |
| Fe +2 Fe2 +3 O4                | Star (*) | 33.09 % | 4.900   | 0.000     | 4.6 %  | Minor               |
| Fe2 O3                         | Blank    | 23.64 % | (1)     | 0.000     | 16.1 % | Major               |
| Fe2 O3                         | Indexed  | 29.70 % | (1)     | 0.000     | 20.3 % | Major               |
| Al2 ( Al2.8 Si1.2 ) O9.54      | Blank    | 28.03 % | 0.760   | 0.000     | 25.2 % | Major               |
| Al2 ( Al2.588 Si1.412 ) O9.706 | Blank    | 27.60 % | 0.800   | 0.000     | 23.6 % | Major               |

| Added Reference | d x by | Scan WL | Wavelength | System        | Space Group | a          | b          |
|-----------------|--------|---------|------------|---------------|-------------|------------|------------|
|                 | 1.0000 | Yes     | 1.54060 Å  | Orthorhombic  | Pbnm (62)   | 4.64000 Å  | 10.00000 Å |
|                 | 1.0000 | Yes     | 1.54060 Å  | Cubic         | Fd-3m (227) | 8.39600 Å  |            |
|                 | 1.0000 | Yes     | 1.54060 Å  | Rhombo.H.axes | R-3c (167)  | 5.02800 Å  |            |
|                 | 1.0000 | Yes     | 1.54060 Å  | Monoclinic    | P (0)       | 12.97000 Å | 10.21000 Å |
|                 | 1.0000 | Yes     | 1.54060 Å  | Orthorhombic  | Pbam (55)   | 7.57850 Å  | 7.68170 Å  |
|                 | 1.0000 | Yes     | 1.54060 Å  | Orthorhombic  | Pbam (55)   | 7.57410 Å  | 7.68560 Å  |

| c          | alpha | beta   | gamma | Z  | Volume                 | Density                 | Cell Tuned | F (N)                  |
|------------|-------|--------|-------|----|------------------------|-------------------------|------------|------------------------|
| 3.03000 Å  |       |        |       | 4  | 140.59 Å <sup>3</sup>  | 4.198 g/cm <sup>3</sup> | No         | F30= 209.4(0.0042, 34) |
|            |       |        |       | 8  | 591.86 Å <sup>3</sup>  | 5.176 g/cm <sup>3</sup> | No         | F26= 59.2(0.0129, 34)  |
| 13.72800 Å |       |        |       | 6  | 300.56 Å <sup>3</sup>  | 5.260 g/cm <sup>3</sup> | No         | F27= 8.6(0.0680, 46)   |
| 8.44000 Å  |       | 95.330 |       | 20 | 1112.82 Å <sup>3</sup> | 4.780 g/cm <sup>3</sup> | No         | F30= 1.6(0.0500, 383)  |
| 2.88640 Å  |       |        |       | 1  | 168.03 Å <sup>3</sup>  | 3.121 g/cm <sup>3</sup> | No         | F30= 999.9(0.0000, 34) |
| 2.88582 Å  |       |        |       | 1  | 167.99 Å <sup>3</sup>  | 3.151 g/cm <sup>3</sup> | No         | F30= 999.9(0.0000, 32) |

**Figure S3.** Pattern list of KaFe, representing composition, obtained from XRD analysis.

## Pattern List #1

| Show | Icon                                                                              | Color                                                                             | Index | Name            | Parent          | Scan                                              | Pattern #       | Compound Name    |
|------|-----------------------------------------------------------------------------------|-----------------------------------------------------------------------------------|-------|-----------------|-----------------|---------------------------------------------------|-----------------|------------------|
| Yes  |  |  | 3     | PDF 00-026-0315 | Pattern List #1 | HgKaFe_full_exported_background subtracted.raw #1 | PDF 00-026-0315 | Mercury Chloride |
| Yes  |  |  | 1     | PDF 00-039-1346 | Pattern List #1 | HgKaFe_full_exported_background subtracted.raw #1 | PDF 00-039-1346 | Maghemite-C, syn |
| Yes  |  |  | 5     | PDF 00-016-0606 | Pattern List #1 | HgKaFe_full_exported_background subtracted.raw #1 | PDF 00-016-0606 | Nacrite-2M2      |
| Yes  |  |  | 4     | PDF 00-002-0452 | Pattern List #1 | HgKaFe_full_exported_background subtracted.raw #1 | PDF 00-002-0452 | Mullite          |
| Yes  |  |  | 2     | PDF 00-034-1103 | Pattern List #1 | HgKaFe_full_exported_background subtracted.raw #1 | PDF 00-034-1103 | Mercury Chloride |

| Formula             | Quality  | Y-Scale | I/Ic DB | I/Ic User | S-Q    | Concentration Level | Added Reference | d x by | Scan WL | Wavelength | System       |
|---------------------|----------|---------|---------|-----------|--------|---------------------|-----------------|--------|---------|------------|--------------|
| Hg Cl2              | Star (*) | 12.58 % | 3.200   | 0.000     | 4.2 %  | Minor               |                 | 1.0000 | Yes     | 1.54060 Å  | Orthorhombic |
| Fe2 O3              | Star (*) | 15.46 % | 1.400   | 0.000     | 11.9 % | Major               |                 | 1.0000 | Yes     | 1.54060 Å  | Cubic        |
| Al2 Si2 O5 ( O H )4 | Indexed  | 18.95 % | (1)     | 0.000     | 20.4 % | Major               |                 | 1.0000 | Yes     | 1.54060 Å  | Monoclinic   |
| 3 Al2 O3 · 2 Si O2  | Indexed  | 28.67 % | (1)     | 0.000     | 30.9 % | Major               |                 | 1.0000 | Yes     | 1.54060 Å  | Orthorhombic |
| Hg2 Cl2             | Indexed  | 30.30 % | (1)     | 0.000     | 32.6 % | Major               |                 | 1.0000 | Yes     | 1.54060 Å  | Monoclinic   |

| Space Group | a         | b          | c          | alpha | beta     | gamma | Z  | Volume                | Density                 | Cell Tuned | F (N)                 |
|-------------|-----------|------------|------------|-------|----------|-------|----|-----------------------|-------------------------|------------|-----------------------|
| Pmnb (62)   | 5.97560 Å | 12.76800 Å | 4.33470 Å  |       |          |       | 4  | 330.72 Å <sup>3</sup> | 5.490 g/cm <sup>3</sup> | No         | F30= 55.9(0.0117, 46) |
| P4132 (213) | 8.35150 Å |            |            |       |          |       | 11 | 582.50 Å <sup>3</sup> | 4.900 g/cm <sup>3</sup> | No         | F30= 94.9(0.0090, 35) |
| Cc (9)      | 8.90900 Å | 5.14600 Å  | 15.69700 Å |       | 113.70 ° |       | 4  | 658.95 Å <sup>3</sup> | 2.650 g/cm <sup>3</sup> | No         | F30= 19.8(0.0320, 47) |
|             | 7.52000 Å | 7.65000 Å  | 2.89000 Å  |       |          |       |    | 166.26 Å <sup>3</sup> | 3.156 g/cm <sup>3</sup> | No         | F29= 6.6(0.0600, 74)  |
| P21/m (11)  | 4.43700 Å | 10.90200 Å | 4.43900 Å  |       | 90.400 ° |       |    | 214.72 Å <sup>3</sup> |                         | No         | F28= 8.2(0.0220, 158) |

**Figure S4.** Pattern list of HgKaFe, representing composition, obtained from XRD analysis.

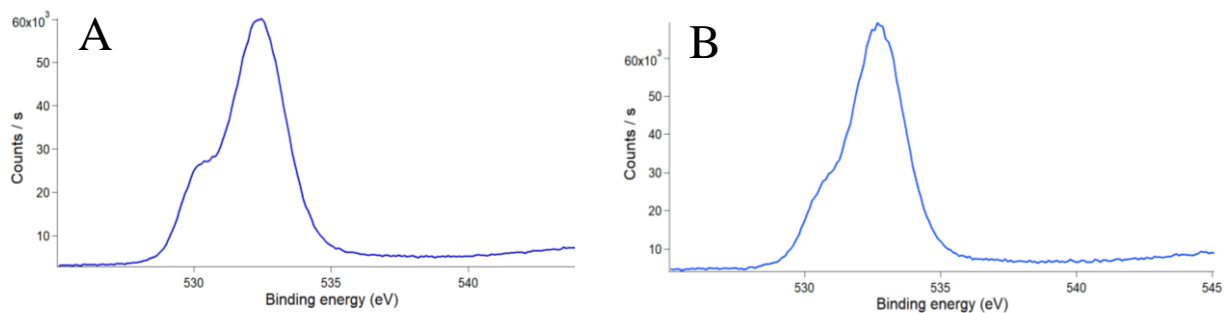

**Figure S5.** A represents XPS spectra for the element O in KaFe; B represents XPS spectra for the element O, respectively in HgKaFe.

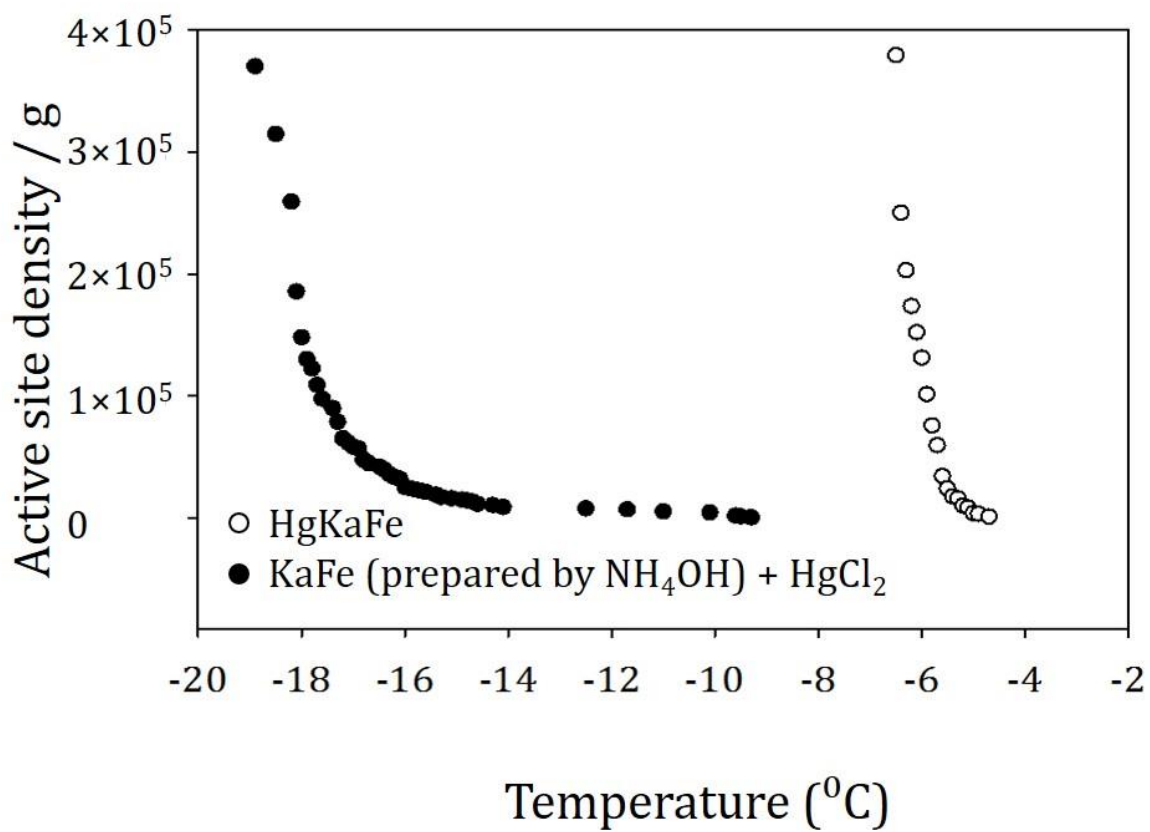

**Figure S6.** Comparison of the active site density per gram against temperature of  $\text{HgCl}_2$  ( $3.69 \times 10^{-3} \text{ M}$ ) with 0.0025g KaFe (made by using  $\text{NaBH}_4$  and ammonium hydroxide) in 10 mL milli-Q water.

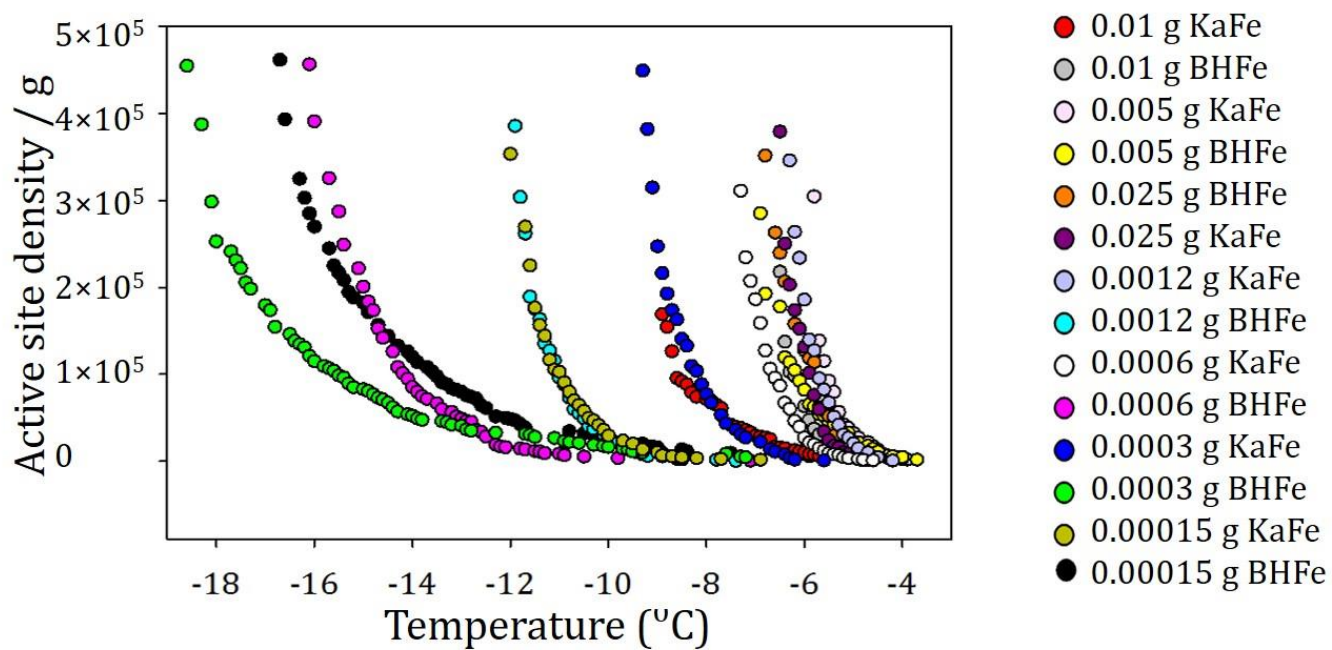

**Figure S7.** Comparison of the active site density per gram against temperature of  $3.69 \times 10^{-3}$  M  $\text{HgCl}_2$  with different amount of BHFe and KaFe in 10 mL milli-Q water.



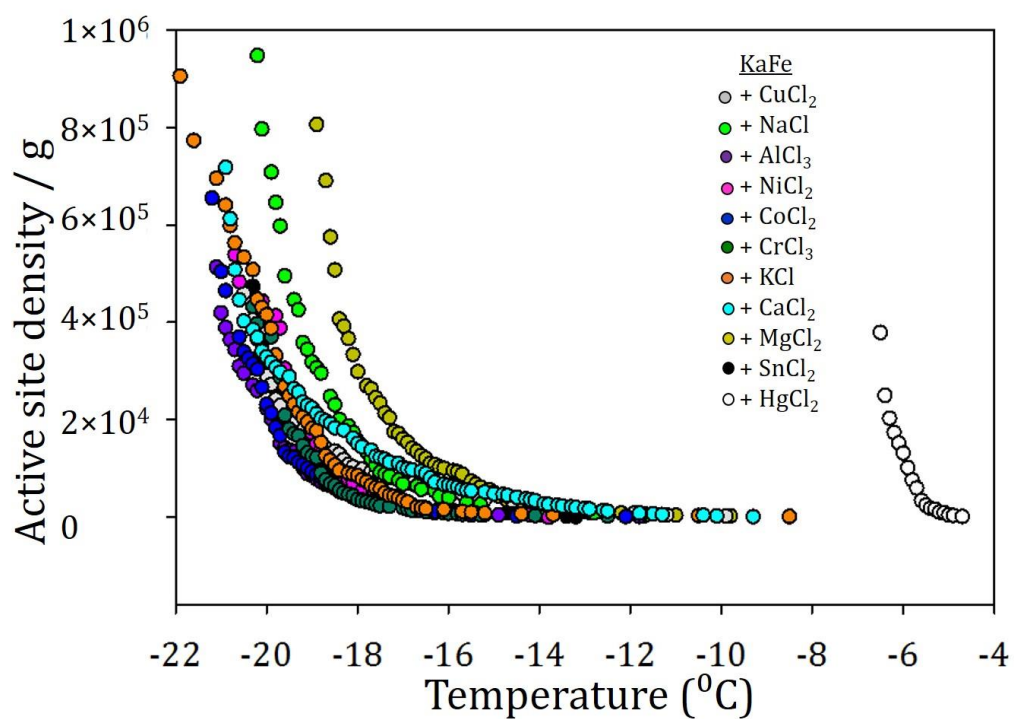

**Figure S8.** Comparison of the active site density per gram against temperature of  $3.69 \times 10^{-3}$  M different metal chloride with 0.0025g KaFe in 10 mL milli-Q water.

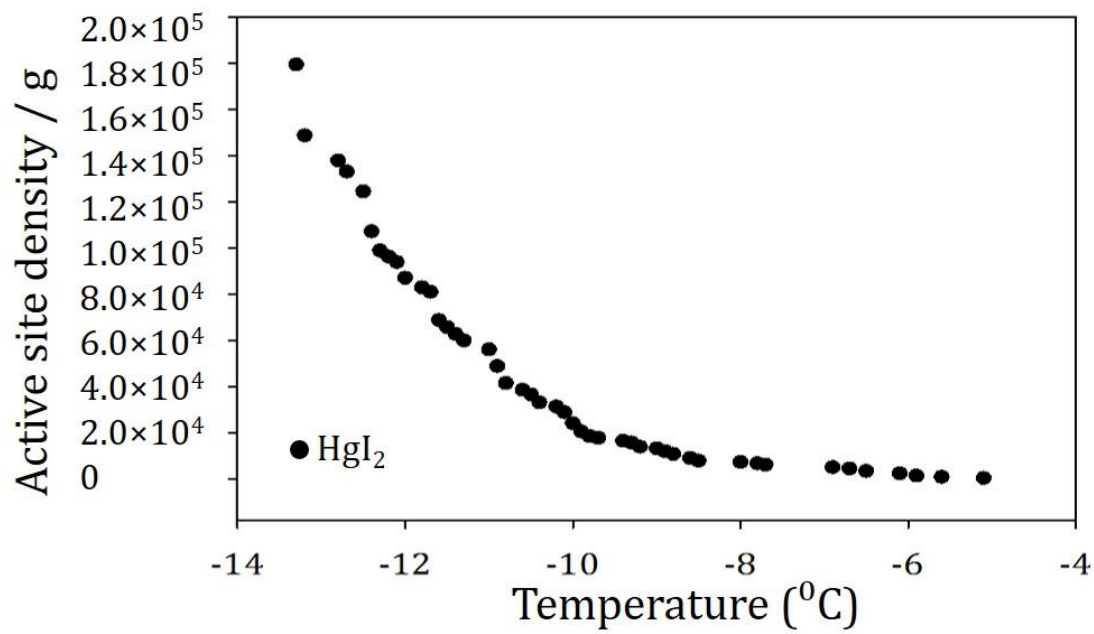

**Figure S9.** The active site density per gram against temperature of 0.01 g HgI<sub>2</sub>, dispersed in 10 mL milli-Q water.

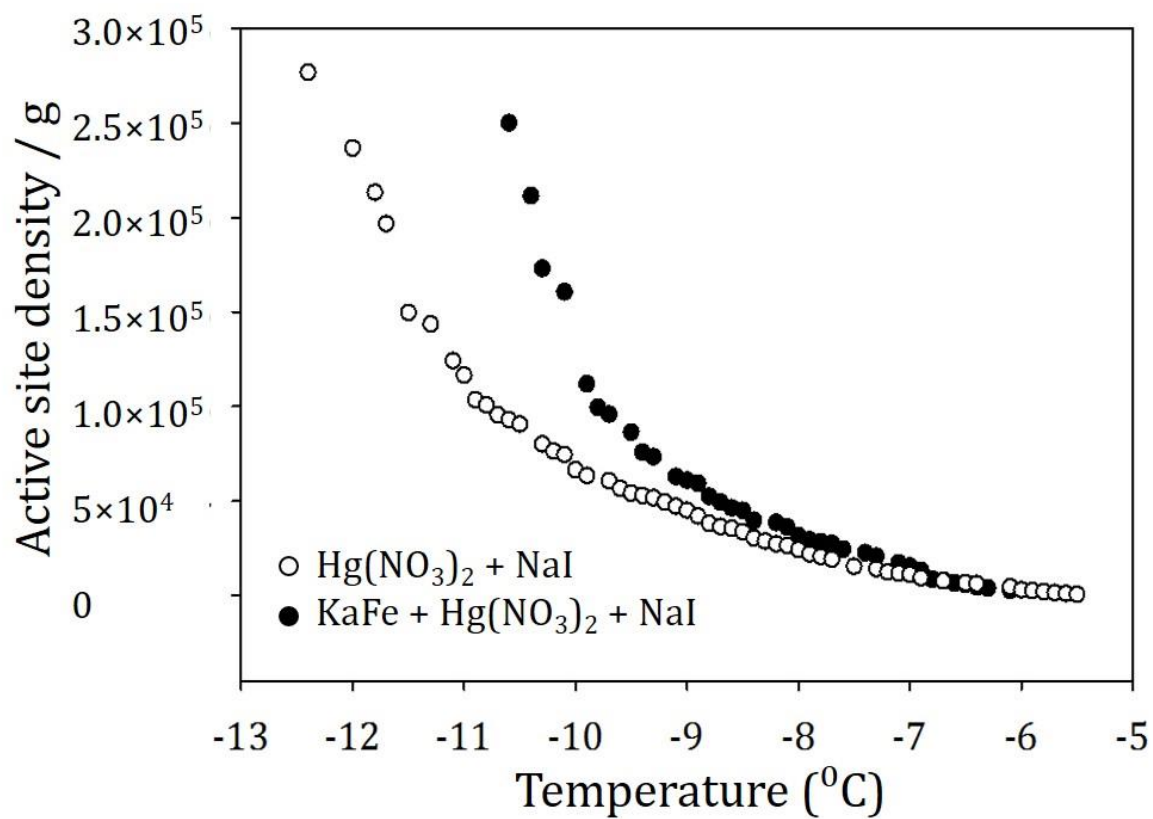

**Figure S10.** Comparison of the active site density per gram against temperature of  $3.69 \times 10^{-3}$  M  $\text{Hg}(\text{NO}_3)_2$  and  $1.7 \times 10^{-2}$  M NaI in 10 mL milli-Q water with and without KaFe.

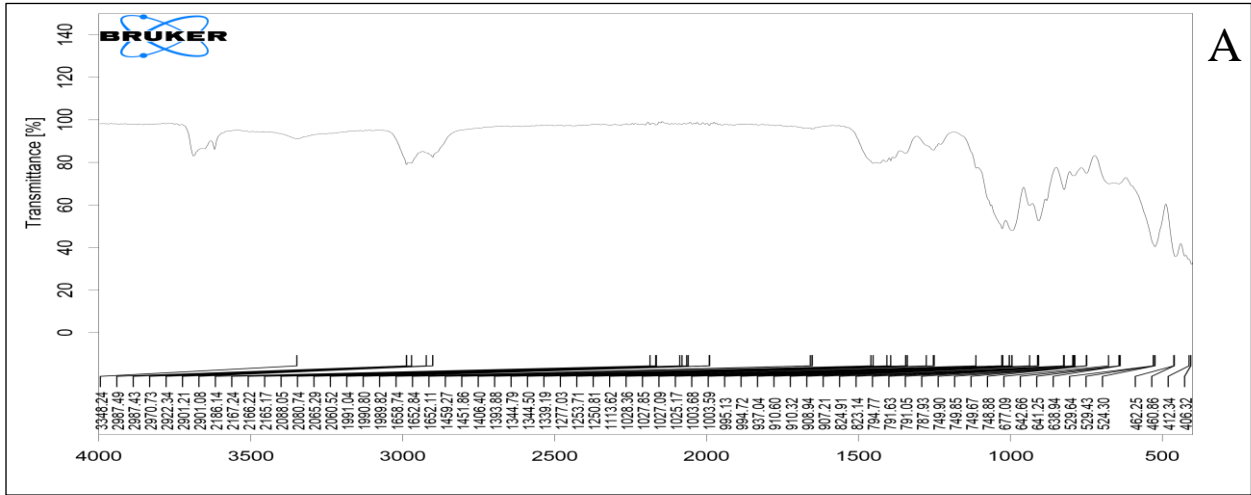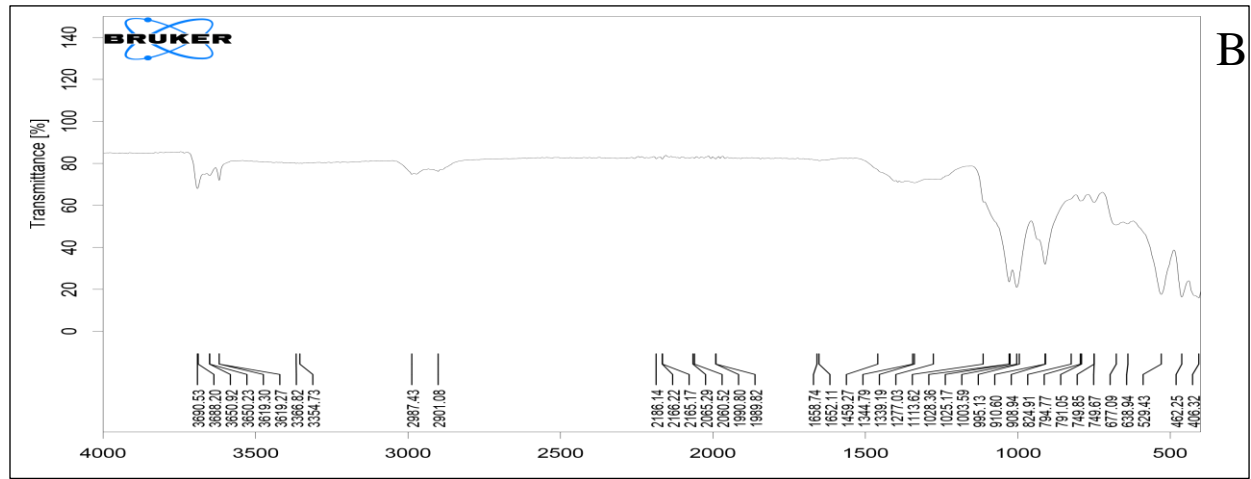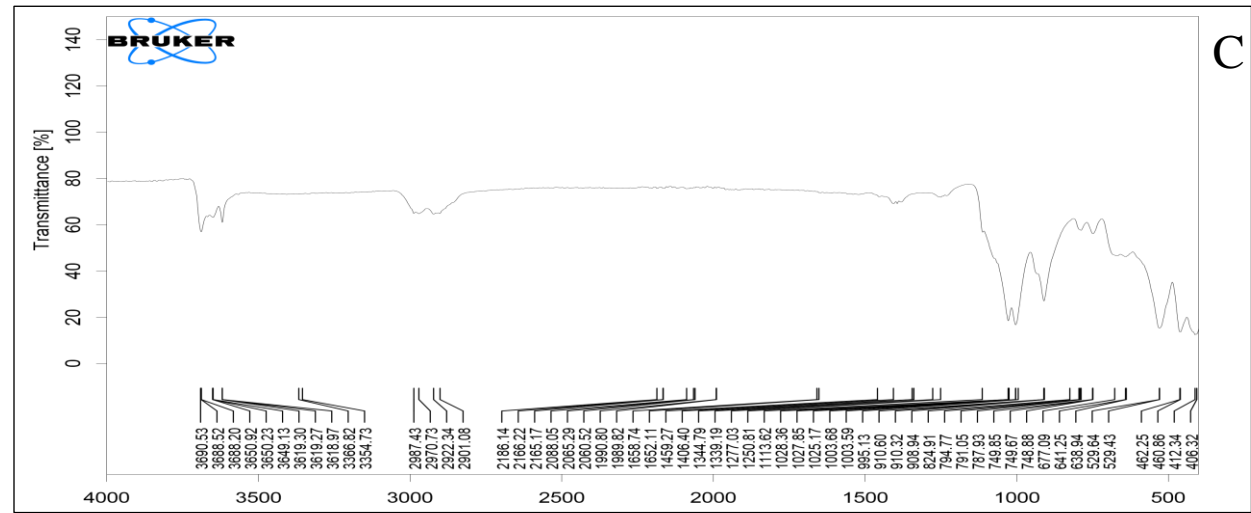

**Figure S11.** Infra-red spectra of (A) kaolin, (B) KaFe and (C) WHgKaFe

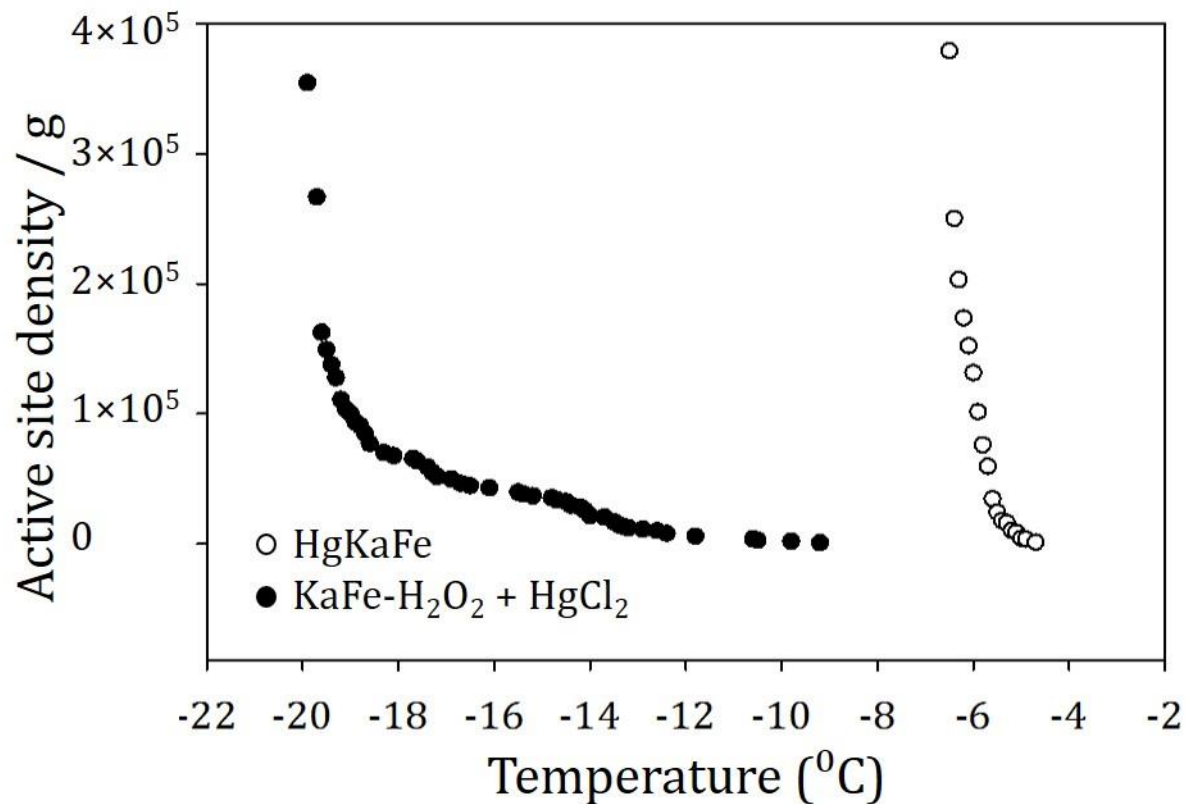

**Figure S12.** Comparison of the active site density per gram against temperature of 0.0025 g KaFe and OKaFe with 10 mL  $3.69 \times 10^{-3}$  M  $\text{HgCl}_2$ .

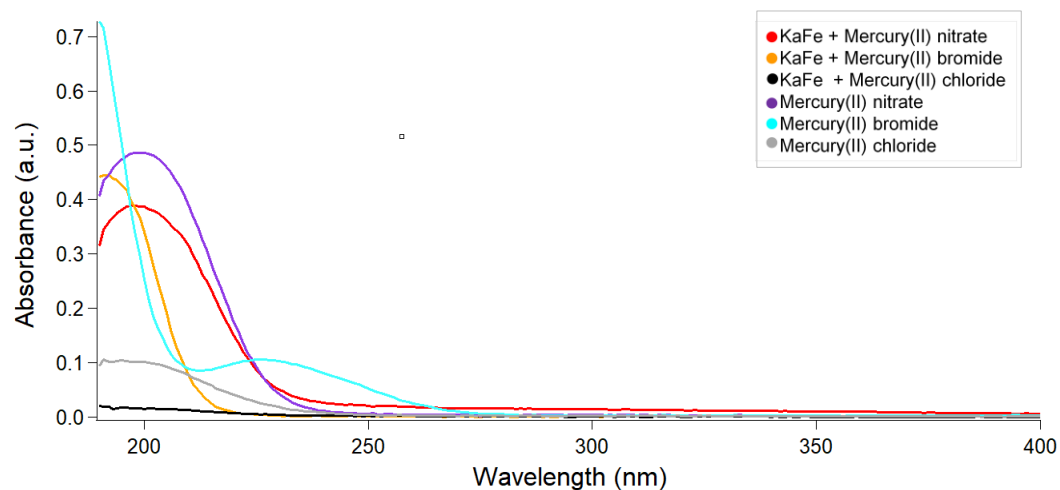

**Figure S13.** UV-Vis spectra after sonication of  $3.69 \times 10^{-3}$  M different Hg(II) salts with and without KaFe (0.01 g). The spectra have been recorded after diluting the supernatant by 130 times.

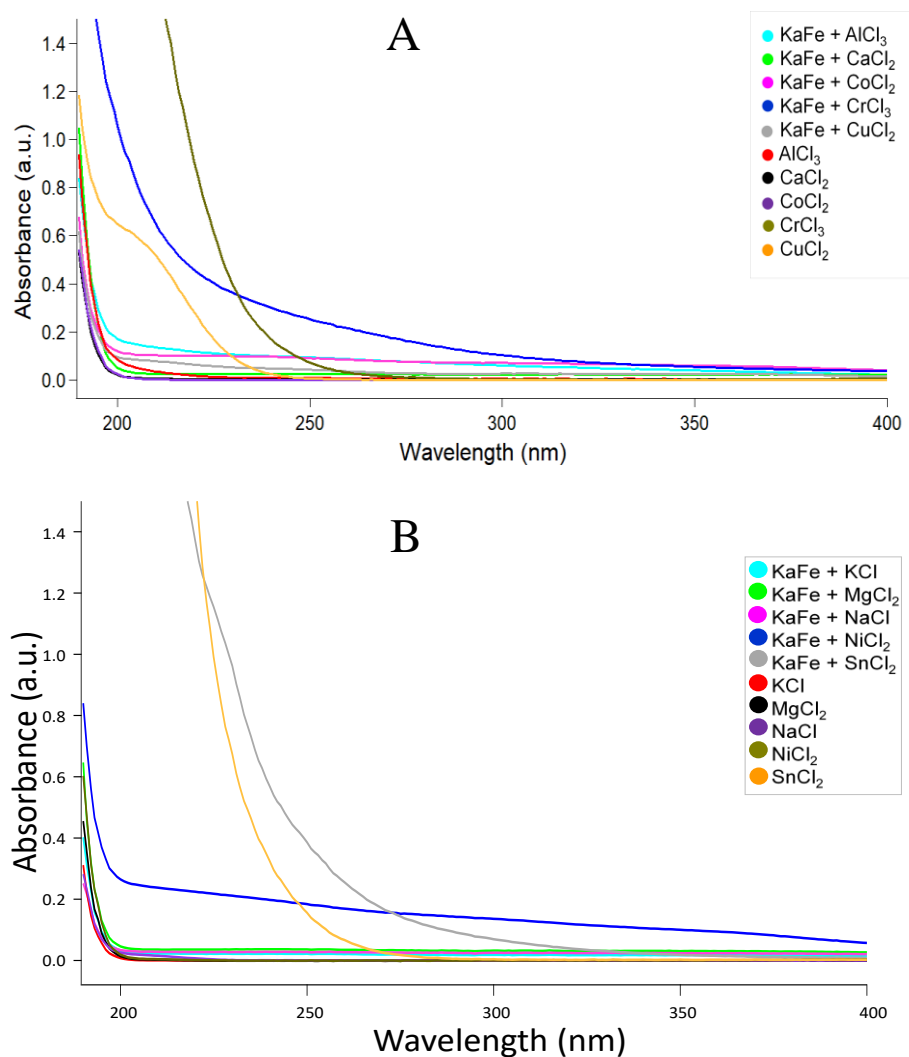

**Figure S14.** (A) UV-Vis spectra of  $3.69 \times 10^{-3}$  M different metal (K, Mg, Na, Ni, Sn) chloride with and without KaFe (0.01 g), spectra were recorded after 13 times dilution of the supernatant with milli-Q water; (B) UV-Vis spectra of  $3.69 \times 10^{-3}$  M different metal (Al, Ca, Co, Cr, Cu) chloride with and without KaFe (0.01 g), spectra were recorded after 13 times dilution of the supernatant with milli-Q water.

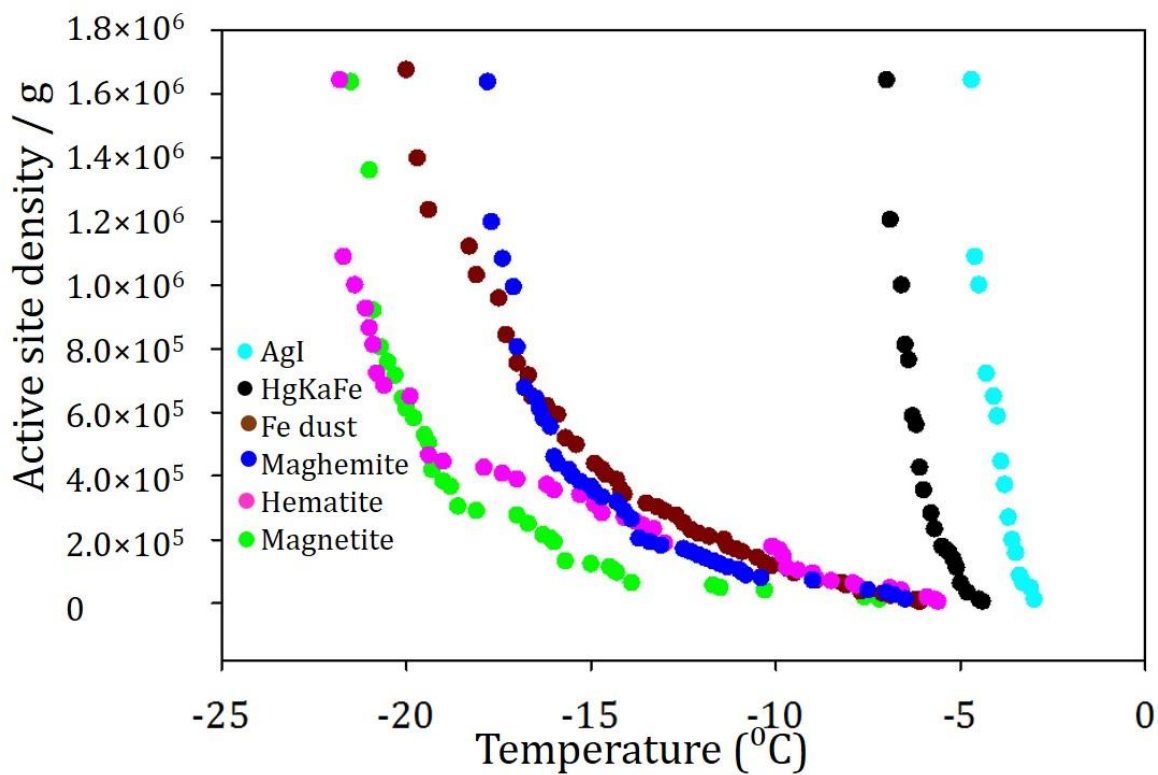

**Figure S15:** Comparison of active site density against temperature of different samples of 0.0025 g in 10 mL milli-Q water. HgKaFe was diluted 5 times to obtain total mass of 0.0025 g in 10 mL milli-Q water.
